# Supplementary material
Source: publisher figshare collection journal article supplement (https://frontiersin.figshare.com/ndownloader/files/14338409)
Supplement: Supplementary file 1 [file 14338409]

## Sheet: Table 1
Authors	Title	Journal	Year	System	Perspective on role of traits	Community component considered	Study site
Reynolds, C; Dokulil, M; Padisak, J	Understanding the assembly of phytoplankton in relation to the trophic spectrum: where are we now?	HYDROBIOLOGIA	2000	Freshwater	Environment--> community assembly	whole community	conceptual
Naselli-Flores, L; Barone, R	Pluriannual morphological variability of phytoplankton in a highly productive Mediterranean reservoir (Lake Arancio, Southwestern Sicily)	HYDROBIOLOGIA	2007	Freshwater	Environment--> Trait dynamics	whole community	Lake Arancio (Mediterranean reservoir, Italy)
Follows, MJ; Dutkiewicz, S; Grant, S; Chisholm, SW	Emergent biogeography of microbial communities in a model ocean	SCIENCE	2007	Marine	Trait--> ecosystem biogeography	whole community	Global Ocean
Litchman, E; Klausmeier, CA; Schofield, OM; Falkowski, PG	The role of functional traits and trade-offs in structuring phytoplankton communities: scaling from cellular to ecosystem level	ECOLOGY LETTERS	2007	Marine	Trait--> community structure	Coccolithophores, Diatoms, Dinoflagellates	Compilation of marine data
Litchman, E; Klausmeier, CA	Trait-Based Community Ecology of Phytoplankton	ANNUAL REVIEW OF ECOLOGY EVOLUTION AND SYSTEMATICS	2008	Marine/Freshwater	General trait ecology	whole community	conceptual
Strom, SL	Microbial ecology of ocean biogeochemistry: A community perspective	SCIENCE	2008	Marine	Trait--> Biogeochemistry	whole community	Marine
Hickman, AE; Dutkiewicz, S; Williams, RG; Follows, MJ	Modelling the effects of chromatic adaptation on phytoplankton community structure in the oligotrophic ocean	MARINE ECOLOGY PROGRESS SERIES	2010	Marine	Trait--> spatial distribution	whole community	Modelling
Finkel, ZV; Beardall, J; Flynn, KJ; Quigg, A; Rees, TAV; Raven, JA	Phytoplankton in a changing world: cell size and elemental stoichiometry	JOURNAL OF PLANKTON RESEARCH	2010	Marine	Environment--> trait--> environment	whole community	Review
Bragg, JG; Dutkiewicz, S; Jahn, O; Follows, MJ; Chisholm, SW	Modeling Selective Pressures on Phytoplankton in the Global Ocean	PLOS ONE	2010	Marine	Trait--> nitrogen use/biogeography	Pico-phytoplankton	Marine
Longhi, ML; Beisner, BE	Patterns in taxonomic and functional diversity of lake phytoplankton	FRESHWATER BIOLOGY	2010	Freshwater	Environment--> Trait distribution	whole community	Canadian temperate lakes
Litchman, E; Pinto, PD; Klausmeier, CA; Thomas, MK; Yoshiyama, K	Linking traits to species diversity and community structure in phytoplankton	HYDROBIOLOGIA	2010	Marine/Freshwater	Trait--> species distributions	whole community	Review
Follows, MJ; Dutkiewicz, S	Modeling Diverse Communities of Marine Microbes	ANNUAL REVIEW OF MARINE SCIENCE, VOL 3	2011	Marine	Trait--> ecosystem biogeography	whole community	Global ocean
Behl, S; Donval, A; Stibor, H	The relative importance of species diversity and functional group diversity on carbon uptake in phytoplankton communitties	LIMNOLOGY AND OCEANOGRAPHY	2011	Freshwater	Trait--> ecosystem function	Experimental communities	Laboratory experiment
Schwaderer, AS; Yoshiyama, K; Pinto, PT; Swenson, NG; Klausmeier, CA; Litchman, E	Eco-evolutionary differences in light utilization traits and distributions of freshwater phytoplankton	LIMNOLOGY AND OCEANOGRAPHY	2011	Freshwater	Trait--> biogeography	whole community	Laboratory and lakes
Rocha, MR; Gaedke, U; Vasseur, DA	Functionally similar species have similar dynamics	JOURNAL OF ECOLOGY	2011	Freshwater	Environment--> community dynamics	whole community	Lake Constance (pre-alpine lake, Germany)
Litchman, E; Edwards, KF; Klausmeier, CA; Thomas, MK	Phytoplankton niches, traits and eco-evolutionary responses to global environmental change	MARINE ECOLOGY PROGRESS SERIES	2012	Marine	Trait--> niche--> community response	whole community	Global ocean
Floder, S; Hillebrand, H	Species traits and species diversity affect community stability in a multiple stressor framework	AQUATIC BIOLOGY	2012	Freshwater	Trait--> community stability	8 species	experimental
Pomati, F; Matthews, B; Jokela, J; Schildknecht, A; Ibelings, BW	Effects of re-oligotrophication and climate warming on plankton richness and community stability in a deep mesotrophic lake	OIKOS	2012	Freshwater	Environment--> community structure/dynamics	whole community	Lake Zurich (pre-alpine lake, Switzerland)
David, V; Ryckaert, M; Karpytchev, M; Bacher, C; Arnaudeau, V; Vidal, N; Maurer, D; Niquil, N	Spatial and long-term changes in the functional and structural phytoplankton communities along the French Atlantic coast	ESTUARINE COASTAL AND SHELF SCIENCE	2012	Estuary	Environment--> community assembly	whole community	8 Estuaries Atlantic coast (France)
Kruk, C; Segura, AM	The habitat template of phytoplankton morphology-based functional groups	HYDROBIOLOGIA	2012	Freshwater	Environment--> community assembly	whole community	211 lakes world wide
Winder, M; Sommer, U	Phytoplankton response to a changing climate	HYDROBIOLOGIA	2012	Marine/Freshwater	Environment--> Trait distribution	whole community	conceptual
Rocha, MR; Vasseur, DA; Gaedke, U	Seasonal Variations Alter the Impact of Functional Traits on Plankton Dynamics	PLOS ONE	2012	Freshwater	Trait--> community dynamics	whole community	Lake Constance (pre-alpine lake, Germany)
Stanca, E; Cellamare, M; Basset, A	Geometric shape as a trait to study phytoplankton distributions in aquatic ecosystems	HYDROBIOLOGIA	2013	Marine	Environment--> Trait distribution	whole community	Mediterranean Sea
Edwards, KF; Litchman, E; Klausmeier, CA	Functional traits explain phytoplankton community structure and seasonal dynamics in a marine ecosystem	ECOLOGY LETTERS	2013	Marine	Trait--> community structure/dynamics	whole community	English Channel
Fiksen, O; Follows, MJ; Aksnes, DL	Trait-based models of nutrient uptake in microbes extend the Michaelis-Menten framework	LIMNOLOGY AND OCEANOGRAPHY	2013	Marine/Freshwater	Trait--> community structure/dynamics	whole community	Modelling
Cellamare, M; Pinto, PD; Leitao, M; Coste, M; Boutry, S; Haury, J	Using functional approaches to study phytoplankton communities in a temperate region exposed to tropical species dispersal	HYDROBIOLOGIA	2013	Freshwater	Environment--> community assembly	whole community	5 temperate lakes (France)
Bovo-Scomparin, VM; Train, S; Rodrigues, LC	Influence of reservoirs on phytoplankton dispersion and functional traits: a case study in the Upper Parana River, Brazil	HYDROBIOLOGIA	2013	Freshwater	Environment--> community assembly	whole community	Reservoirs in the Parana Riber (Brazil)
Segura, AM; Kruk, C; Calliari, D; Fort, H	Use of a morphology-based functional approach to model phytoplankton community succession in a shallow subtropical lake	FRESHWATER BIOLOGY	2013	Freshwater	(morphological) traits--> community dynamics	whole community	Lake Rodo (subtropical pond, Uruguay)
Barton, AD; Pershing, AJ; Litchman, E; Record, NR; Edwards, KF; Finkel, ZV; Kiorboe, T; Ward, BA	The biogeography of marine plankton traits	ECOLOGY LETTERS	2013	Marine	Trait biogeography	whole community	Global ocean
Palffy, K; Presing, M; Voros, L	Diversity patterns of trait-based phytoplankton functional groups in two basins of a large, shallow lake (Lake Balaton, Hungary) with different trophic state	AQUATIC ECOLOGY	2013	Freshwater	Environment--> community assembly	whole community	Lake Balaton (temperate lake, Hungary)
Edwards, KF; Litchman, E; Klausmeier, CA	Functional traits explain phytoplankton responses to environmental gradients across lakes of the United States	ECOLOGY	2013	Freshwater	Environment--> community response	whole community	North Americam lakes (USA)
Beisner, BE; Longhi, ML	Spatial overlap in lake phytoplankton: Relations with environmental factors and consequences for diversity	LIMNOLOGY AND OCEANOGRAPHY	2013	Freshwater	Environment--> Trait distribution	whole community	Canadian temperate lakes
Acevedo-Trejos, E; Brandt, G; Merico, A; Smith, SL	Biogeographical patterns of phytoplankton community size structure in the oceans	GLOBAL ECOLOGY AND BIOGEOGRAPHY	2013	Marine	Trait biogeography	whole community	Atlantic and global Ocean
Fraisse, S; Bormans, M; Lagadeuc, Y	Morphofunctional traits reflect differences in phytoplankton community between rivers of contrasting flow regime	AQUATIC ECOLOGY	2013	Freshwater	Environment (flow regime) --> trait	whole community	Rivers Aulne and Elorn (France)
Reynolds, CS; Elliott, JA; Frassl, MA	Predictive utility of trait-separated phytoplankton groups: A robust approach to modeling population dynamics	JOURNAL OF GREAT LAKES RESEARCH	2014	Freshwater	Trait--> community dynamics	whole community	Modelling
Daines, SJ; Clark, JR; Lenton, TM	Multiple environmental controls on phytoplankton growth strategies determine adaptive responses of the N:P ratio	ECOLOGY LETTERS	2014	Marine	Trait--> ecosystem biogeography	whole community	Global ocean
Moser, GAO; Takanohashi, RA; Braz, MD; de Lima, DT; Kirsten, FV; Guerra, JV; Fernandes, AM; Pollery, RCG	Phytoplankton spatial distribution on the Continental Shelf off Rio de Janeiro, from Paraiba do Sul River to Cabo Frio	HYDROBIOLOGIA	2014	Marine	Environment--> community assembly	whole community	Continental shelf, off Brazil
Fernandez, C; Caceres, EJ; Parodi, ER	Phytoplankton Development in a Highly Eutrophic man-made Lake From the Pampa plain of Argentina-a functional Approach	INTERNATIONAL JOURNAL OF ENVIRONMENTAL RESEARCH	2014	Freshwater	Environment--> community assembly	whole community	Paso de las Piedras Reservoir, Argentina
Tsai, CH; Miki, T; Chang, CW; Ishikawa, K; Ichise, S; Kumagai, M; Hsieh, CH	Phytoplankton functional group dynamics explain species abundance distribution in a directionally changing environment	ECOLOGY	2014	Freshwater	Environment--> community dynamics	whole community	Lake Biwa (temperate lake, Japan)
Chen, N; Liu, L; Li, YF; Qiao, DY; Li, YP; Zhang, Y; Lv, YY	Morphology-based classification of functional groups for potamoplankton	JOURNAL OF LIMNOLOGY	2015	Freshwater	Environment--> community structure/dynamics	whole community	101 rivers, China
Kruk, C; Martinez, A; Nogueira, L; Alonso, C; Calliari, D	Morphological traits variability reflects light limitation of phytoplankton production in a highly productive subtropical estuary (Rio de la Plata, South America)	MARINE BIOLOGY	2015	Estuary	Environment--> trait variation	whole community	Rio de la Plata (estuary, Uruguay)
Acevedo-Trejos, E; Brandt, G; Bruggeman, J; Merico, A	Mechanisms shaping size structure and functional diversity of phytoplankton communities in the ocean	SCIENTIFIC REPORTS	2015	Marine	Environment --> Trait --> biogeography	whole community	Modelling
Weithoff, G; Rocha, MR; Gaedke, U	Comparing seasonal dynamics of functional and taxonomic diversity reveals the driving forces underlying phytoplankton community structure	FRESHWATER BIOLOGY	2015	Freshwater	Environment --> community dynamics	whole community	Lake Constance (pre-alpine lake, Germany)
Salmaso, N; Naselli-Flores, L; Padisak, J	Functional classifications and their application in phytoplankton ecology	FRESHWATER BIOLOGY	2015	Freshwater	Traits and trait variation	whole community	Review
Litchman, E; Edwards, KF; Klausmeier, CA	Microbial resource utilization traits and trade-offs: implications for community structure, functioning, and biogeochemical impacts at present and in the future	FRONTIERS IN MICROBIOLOGY	2015	Marine/Freshwater	Traits--> biogeochemistry	whole community	Review
Fraisse, S; Bormans, M; Lagadeuc, Y	Turbulence effects on phytoplankton morphofunctional traits selection	LIMNOLOGY AND OCEANOGRAPHY	2015	Freshwater	Environment--> community assembly	whole community	Experimental chamber
Beamud, SG; Leon, JG; Kruk, C; Pedrozo, F; Diaz, M	Using trait-based approaches to study phytoplankton seasonal succession in a subtropical reservoir in arid central western Argentina	ENVIRONMENTAL MONITORING AND ASSESSMENT	2015	Freshwater	Environment--> community dynamics	whole community	El Carizal (subtropical reservoir, Argentina)
Zwart, JA; Solomon, CT; Jones, SE	Phytoplankton traits predict ecosystem function in a global set of lakes	ECOLOGY	2015	Freshwater	Traits--> ecosystem function	whole community	Modelling
Litchman, E; Pinto, PD; Edwards, KF; Klausmeier, CA; Kremer, CT; Thomas, MK	Global biogeochemical impacts of phytoplankton: a trait-based perspective	JOURNAL OF ECOLOGY	2015	Marine/Freshwater	Traits--> biogeochemistry	whole community	Review
Alexander, H; Rouco, M; Haley, ST; Wilson, ST; Karl, DM; Dyhrman, ST	Functional group-specific traits drive phytoplankton dynamics in the oligotrophic ocean	PROCEEDINGS OF THE NATIONAL ACADEMY OF SCIENCES OF THE UNITED STATES OF AMERICA	2015	Marine	Trait--> community dynamics	whole community	Pacific (Hawaii)
Cellamare, M; Lancon, AM; Leitao, M; Cerasino, L; Obertegger, U; Flaim, G	Phytoplankton functional response to spatial and temporal differences in a cold and oligotrophic lake	HYDROBIOLOGIA	2016	Freshwater	Environment--> community assembly	whole community	Lake Tovel (alpine lake, Italy)
Thomas, MK; Kremer, CT; Litchman, E	Environment and evolutionary history determine the global biogeography of phytoplankton temperature traits	GLOBAL ECOLOGY AND BIOGEOGRAPHY	2016	Marine/Freshwater	Trait biogeography	whole community	Global data set
Ozkundakci, D; Gsell, AS; Hintze, T; Tauscher, H; Adrian, R	Winter severity determines functional trait composition of phytoplankton in seasonally ice-covered lakes	GLOBAL CHANGE BIOLOGY	2016	Freshwater	Environment--> community dynamics	whole community	Lake Müggelsee (temperate lake, Germany)
Bortolini, JC; Moresco, GA; de Paula, ACM; Jati, S; Rodrigues, LC	Functional approach based on morphology as a model of phytoplankton variability in a subtropical floodplain lake: a long-term study	HYDROBIOLOGIA	2016	Freshwater	Environment--> community assembly	whole community	Osmar Lake (subtropical floodplain lake, Brazil)
Smith, SL; Pahlow, M; Merico, A; Acevedo-Trejos, E; Sasai, Y; Yoshikawa, C; Sasaoka, K; Fujiki, T; Matsumoto, K; Honda, MC	Contribution to the Themed Section: Advances in Plankton Modelling and Biodiversity Evaluation Flexible phytoplankton functional type (FlexPFT) model: size-scaling of traits and optimal growth	JOURNAL OF PLANKTON RESEARCH	2016	Marine	Trait/trade-offs	whole community	Pacific (subarctic)/Modelling
Machado, KB; Teresa, FB; Vieira, LCG; Huszar, VLD; Nabout, JC	Comparing the effects of landscape and local environmental variables on taxonomic and functional composition of phytoplankton communities	JOURNAL OF PLANKTON RESEARCH	2016	Freshwater	Environment--> community assembly	whole community	Floodplain lakes (Brazil)
Mutshinda, CM; Finkel, ZV; Widdicombe, CE; Irwin, AJ	Ecological equivalence of species within phytoplankton functional groups	FUNCTIONAL ECOLOGY	2016	Marine	Environment--> community dynamics	Diatoms, dinoflagellates	English Channel
Smith, SL; Vallina, SM; Merico, A	Phytoplankton size-diversity mediates an emergent trade-off in ecosystem functioning for rare versus frequent disturbances	SCIENTIFIC REPORTS	2016	Marine	Trait--> ecosystem function	whole community	Modelling
Pomati, F; Matthews, B; Seehausen, O; Ibelings, BW	Eutrophication and climate warming alter spatial (depth) co-occurrence patterns of lake phytoplankton assemblages	HYDROBIOLOGIA	2017	Freshwater	Environment--> Community assembly	whole community	Lake Zurich
Klais, R; Norros, V; Lehtinen, S; Tamminen, T; Olli, K	Community assembly and drivers of phytoplankton functional structure	FUNCTIONAL ECOLOGY	2017	Marine	Environment --> Trait--> Community assembly	whole community	Baltic Sea
Aubry, FB; Pugnetti, A; Roselli, L; Stanca, E; Acri, F; Finotto, S; Basset, A	Phytoplankton morphological traits in a nutrient-enriched, turbulent Mediterranean microtidal lagoon	JOURNAL OF PLANKTON RESEARCH	2017	Marine	Environment --> Trait distribution	whole community	Mediterranean lagoon
Vadrucci, MR; Barbone, E; Ungaro, N; Romano, A; Bucci, R	Application of taxonomic and morpho-functional properties of phytoplankton communities to water quality assessment for artificial lakes in the Mediterranean Ecoregion(aEuro)	JOURNAL OF PLANKTON RESEARCH	2017	Freshwater	Environment --> community assembly	whole community	Mediterranean lakes (Italy)
Kruk, C; Segura, AM; Costa, LS; Lacerot, G; Kosten, S; Peeters, ETHM; Huszar, VLM; Mazzeo, N; Scheffer, M	Functional redundancy increases towards the tropics in lake phytoplankton	JOURNAL OF PLANKTON RESEARCH	2017	Freshwater	Environment--> Trait distribution	whole community	South-American lakes
Weithoff, G; Gaedke, U	Mean functional traits of lake phytoplankton reflect seasonal and inter-annual changes in nutrients, climate and herbivory	JOURNAL OF PLANKTON RESEARCH	2017	Freshwater	Environment --> community dynamics	whole community	Lake Constance (pre-alpine lake, Germany)
Roselli, L; Litchman, E; Stanca, E; Cozzoli, F; Basset, A	Individual trait variation in phytoplankton communities across multiple spatial scales	JOURNAL OF PLANKTON RESEARCH	2017	Marine	Environment--> trait variation	whole community	5 marine sites
Moser, GAO; Piedras, FR; Oaquim, ABJ; Souza, DS; Leles, SG; de Lima, DT; Ramos, ABA; Farias, CD; Fernandes, AM	Tidal effects on phytoplankton assemblages in a near-pristine estuary: a trait-based approach for the case of a shallow tropical ecosystem in Brazil	MARINE ECOLOGY-AN EVOLUTIONARY PERSPECTIVE	2017	Estuary	Environment--> Community assembly	whole community	Bara Grande Estuary, Brazil
Bortolini, JC; Bueno, NC	Temporal dynamics of phytoplankton using the morphology-based functional approach in a subtropical river	BRAZILIAN JOURNAL OF BOTANY	2017	Freshwater	Environment--> community dynamics	whole community	Sao Joao River (subtropical, Brazil)
Vallina, SM; Cermeno, P; Dutkiewicz, S; Loreau, M; Montoya, JM	Phytoplankton functional diversity increases ecosystem productivity and stability	ECOLOGICAL MODELLING	2017	Marine	Trait diversity--> ecosystem function	whole community	Modelling
Cardoso, SJ; Nabout, JC; Farjalla, VF; Lopes, PM; Bozelli, RL; Huszar, VLM; Roland, F	Environmental factors driving phytoplankton taxonomic and functional diversity in Amazonian floodplain lakes	HYDROBIOLOGIA	2017	Freshwater	Environment --> community assembly	whole community	Floodplain lakes (Brazil)
Santana, LM; Weithoff, G; Ferragut, C	Seasonal and spatial functional shifts in phytoplankton communities of five tropical reservoirs	AQUATIC ECOLOGY	2017	Freshwater	Environment --> community assembly	whole community	Tropical reservoirs (Brazil)
Karati, KK; Vineetha, G; Madhu, NV; Anil, P; Dayana, M; Shihab, BK; Muhsin, AI; Riyas, C; Raveendran, TV	Variability in the phytoplankton community of Kavaratti reef ecosystem (northern Indian Ocean) during peak and waning periods of El Nino 2016	ENVIRONMENTAL MONITORING AND ASSESSMENT	2017	Marine	Environment --> community assembly	whole community	Kavaratti lagoon, Indian ocean
Abonyi, A; Horvath, Z; Ptacnik, R	Functional richness outperforms taxonomic richness in predicting ecosystem functioning in natural phytoplankton communities	FRESHWATER BIOLOGY	2018	Freshwater	Traits--> ecosystem function	whole community	Scandinavian lakes
Fontana, S; Thomas, MK; Moldoveanu, M; Spaak, P; Pomati, F	Individual-level trait diversity predicts phytoplankton community properties better than species richness or evenness	ISME JOURNAL	2018	Freshwater	Traits--> community assembly	whole community	Lake Greifensee, Lake Zurich (Switzerland), 26 lakes in the Danube Delta (Romania)
				Legend:	1) Effects of the environment on trait assembly or dynamics
					2) Trait interactions on community structure or dynamics
					3) Traits on ecosystem function or its biogeography
